# Supplementary material for: Is the Hong Kong Liver Cancer staging system the best guide for hepatitis B virus-related hepatocellular carcinoma patients with multiple tumors?
Source: PubMed Central journal article supplement (PMC5239499; doi:10.18632/oncotarget.9956), 2016-06-13
Supplement: oncotarget-07-51598-s001.pdf [file oncotarget-07-51598-s001.pdf]

## Is the hong kong liver cancer staging system the best guide for hepatitis B virus-related hepatocellular carcinoma patients with multiple tumors?

### SUPPLEMENTARY TABLE

Supplementary Table S1: Base line characteristics before matching related to Surgery and TACE stratified by HKLC criteria

|                         | Within HKLC criteria |            | <i>P</i> | Outside HKLC criteria |            | <i>P</i> |
|-------------------------|----------------------|------------|----------|-----------------------|------------|----------|
|                         | Surgery              | TACE       |          | Surgery               | TACE       |          |
|                         | (n = 720)            | (n = 264)  |          | (n = 221)             | (n = 140)  |          |
| Age, years              |                      |            | 0.119    |                       |            | <0.001*  |
| ≤ 60                    | 558 (77.5)           | 192 (72.7) |          | 186 (84.2)            | 96 (68.6)  |          |
| > 60                    | 162 (22.5)           | 72 (27.3)  |          | 35 (15.8)             | 44 (31.4)  |          |
| Sex                     |                      |            | 0.496    |                       |            | 0.518    |
| Female                  | 66 (9.2)             | 28 (10.6)  |          | 27 (12.2)             | 14 (10.0)  |          |
| Male                    | 654 (90.8)           | 236 (89.4) |          | 194 (87.8)            | 126 (90.0) |          |
| Total bilirubin, μmol/L |                      |            | 0.989    |                       |            | 0.011*   |
| ≤ 20.4                  | 603 (83.8)           | 221 (83.7) |          | 193 (87.3)            | 108 (77.1) |          |
| > 20.4                  | 117 (16.2)           | 43 (16.3)  |          | 28 (12.7)             | 32 (22.9)  |          |
| Serum ALT, u/L          |                      |            | 0.859    |                       |            | 0.126    |
| ≤ 42                    | 451 (62.6)           | 167 (63.3) |          | 134 (60.6)            | 96 (68.6)  |          |
| > 42                    | 269 (37.4)           | 97 (36.7)  |          | 87 (39.4)             | 44 (31.4)  |          |
| Serum GGT, u/L          |                      |            | 0.226    |                       |            | 0.689    |
| ≤ 54                    | 259 (36.0)           | 84 (31.8)  |          | 35 (15.8)             | 20 (14.3)  |          |
| > 54                    | 461 (64.0)           | 180 (68.2) |          | 186 (84.2)            | 120 (85.7) |          |
| Serum AFP, ng/mL        |                      |            | 0.185    |                       |            | 0.921    |
| ≤ 20                    | 228 (31.7)           | 72 (27.3)  |          | 37 (16.7)             | 24 (17.1)  |          |
| > 20                    | 492 (68.3)           | 192 (72.7) |          | 184 (83.3)            | 116 (82.9) |          |
| Tumor size, cm          |                      |            | 0.278    |                       |            | <0.001*  |
| ≤ 5                     | 453 (62.9)           | 176 (66.7) |          | 9 (4.1)               | 32 (22.9)  |          |
| > 5                     | 267 (37.1)           | 88 (33.3)  |          | 212 (95.9)            | 108 (77.1) |          |
| Tumor number            |                      |            | <0.001*  |                       |            | <0.001*  |
| ≤ 3                     | 695 (96.5)           | 212 (80.3) |          | 129 (58.4)            | 48 (34.3)  |          |
| > 3                     | 25 (3.5)             | 52 (19.7)  |          | 92 (41.6)             | 92 (65.7)  |          |

(Continued)

|                    | Within HKLC criteria |            |          | Outside HKLC criteria |           |          |
|--------------------|----------------------|------------|----------|-----------------------|-----------|----------|
|                    | Surgery              | TACE       | <i>P</i> | Surgery               | TACE      | <i>P</i> |
|                    | (n = 720)            | (n = 264)  |          | (n = 221)             | (n = 140) |          |
| Tumor thrombus     |                      |            | 0.017*   |                       |           | 0.554    |
| Without            | 692 (96.1)           | 244 (92.4) |          | 63 (28.5)             | 44 (31.4) |          |
| With               | 28 (3.9)             | 20 (7.6)   |          | 158 (71.5)            | 96 (68.6) |          |
| Tumor location     |                      |            | 0.625    |                       |           | 0.436    |
| One lobe           | 427 (59.3)           | 152 (57.6) |          | 96 (43.4)             | 55 (39.3) |          |
| More than one lobe | 293 (40.7)           | 112 (42.4) |          | 125 (56.6)            | 85 (60.7) |          |

\* Significant difference.

Abbreviations: TACE, transcatheter arterial chemoembolization; ALT: alanine aminotransferase; GGT, gamma-glutamyl transferase; AFP, alpha-fetoprotein.
